# Supplementary material for: Conserving Red List plant species by managing landscape fragmentation and permeability
Source: Research Square preprint supplement (doi:10.21203/rs.3.rs-7957482/v1), 2025-11-19
Supplement: Supplementary file 2 [file 876c602351936fda3590f67b.pdf]

## Online Resource 4

### Conserving Red List plant species by managing landscape fragmentation and permeability

Nicu Alexandru Gîlea<sup>1</sup>, Ileana Pătru-Stupariu<sup>2</sup>, Athanasios Gavrilidis<sup>2</sup>, Simona R. Gradinaru<sup>3</sup>, Simona Dumitrița Chirilă<sup>4</sup>, Ana-Maria Florescu<sup>5</sup>, Andrei Ionuț Mărgheșcu<sup>5</sup>

<sup>1</sup>Faculty of Geography, Doctoral School Simion Mehedinti, University of Bucharest Bd. N. Bălcescu, 1, 010041 Bucharest, Romania,

<sup>2</sup> Department of Regional Geography and Environment, Faculty of Geography, University of Bucharest, 1 Bd. N. Bălcescu, 010041 Bucharest, Romania

<sup>3</sup> Swiss Federal Research Institute WSL, Land Use Systems Group

<sup>4</sup> Danube Delta National Institute for Research and Development, Tulcea, Romania

<sup>5</sup> Faculty of Geography, University of Bucharest Bd. N. Bălcescu, 1, 010041 Bucharest, Romania

**Corresponding author:** Nicu Alexandru Gîlea, email: [nicu.gilea@s.unibuc.ro](mailto:nicu.gilea@s.unibuc.ro), tel. 0730633963

#### *Landscape Ecology*

Table 1 presents the final permeability scores used for the landscape permeability assessment.

Table 1. Environmental variables and scores assigned in the landscape permeability assessment process.

| Environmental variable  | Classification / Range              | Permeability |
|-------------------------|-------------------------------------|--------------|
| Land use/cover          | Water                               | 0            |
|                         | Shrubs (SWF)                        | 8            |
|                         | Built-up                            | 0            |
|                         | Agricultural crops                  | 1            |
|                         | Roads                               | 0            |
|                         | Orchard                             | 1            |
|                         | Non-vegetated / sparsely vegetated  | 5            |
|                         | Coniferous forests                  | 1            |
|                         | Deciduous forests                   | 1            |
|                         | Pastures                            | 10           |
| Soil                    | Argiluvissols                       | 7            |
|                         | Cambisols                           | 8            |
|                         | Supplementary Classes (water)       | 0            |
|                         | Mollisols                           | 10           |
|                         | Halomorphic soils                   | 0            |
|                         | Hydromorphic soils                  | 0            |
|                         | Undeveloped/truncated/exposed soils | 5            |
|                         | Organic soils (Histosols)           | 0            |
|                         | Spodosols                           | 0            |
|                         | Umbrisols                           | 0            |
|                         | Vertisols                           | 5            |
| Protected natural areas | NATURA2000 sites (SCI, SAC, SPA)    | 6            |
|                         | Nature reserves (IUCN category IV)  | 8            |
|                         | Unprotected                         | 0            |
| Aspect (degrees)        | Flat / Level (-1)                   | 0            |
|                         | North (0–22.5)                      | 5            |
|                         | North-East (22.5–67.5)              | 8            |
|                         | East (67.5–112.5)                   | 8            |
|                         | South-East (112.5–157.5)            | 8            |
|                         | South (157.5–202.5)                 | 10           |
|                         | South-West (202.5–247.5)            | 10           |
|                         | West (247.5–292.5)                  | 8            |
|                         | North-West (292.5–337.5)            | 7            |

|                                           |                   |    |
|-------------------------------------------|-------------------|----|
|                                           | North (337.5–360) | 5  |
| <b>Slope (degrees)</b>                    | 0–3°              | 5  |
|                                           | 3–10°             | 10 |
|                                           | 10–20°            | 9  |
|                                           | 20–30°            | 7  |
|                                           | > 30°             | 5  |
| <b>Livestock density on pastures (LU)</b> | 0.0–0.1 LU        | 1  |
|                                           | 0.1–0.2 LU        | 3  |
|                                           | 0.2–0.3 LU        | 5  |
|                                           | 0.3–0.4 LU        | 8  |
|                                           | 0.4–0.5 LU        | 10 |
|                                           | 0.5–0.6 LU        | 10 |
|                                           | 0.6–0.7 LU        | 8  |
|                                           | 0.7–0.8 LU        | 5  |
|                                           | 0.8–0.9 LU        | 3  |
|                                           | 0.9–1.0 LU        | 1  |
|                                           | > 1.0 LU          | 0  |
| <b>Habitat fragmentation</b>              | ≤ 0.5             | 10 |
|                                           | 0.5–1             | 9  |
|                                           | 1–2               | 8  |
|                                           | 2–5               | 7  |
|                                           | 5–10              | 6  |
|                                           | 10–20             | 5  |
|                                           | 20–30             | 4  |
|                                           | 30–50             | 3  |
|                                           | 50–75             | 2  |
|                                           | 75–100            | 1  |
|                                           | > 100             | 0  |
