# Supplementary material for: Conserving Red List plant species by managing landscape fragmentation and permeability
Source: Research Square preprint supplement (doi:10.21203/rs.3.rs-7957482/v1), 2025-11-19
Supplement: Supplementary file 3 [file c4a5538f94341fc5adbd9308.pdf]

## Conserving Red List plant species by managing landscape fragmentation and permeability

Nicu Alexandru Gilea<sup>1</sup>, Ileana Pătru-Stupariu<sup>2</sup>, Athanasios Gavrilidis<sup>2</sup>, Simona R. Gradinaru<sup>3</sup>, Simona Dumitrița Chirilă<sup>4</sup>, Ana-Maria Florescu<sup>5</sup>, Andrei Ionuț Mărgheșcu<sup>5</sup>

<sup>1</sup>Faculty of Geography, Doctoral School Simion Mehedinti, University of Bucharest Bd. N. Bălcescu, 1, 010041 Bucharest, Romania,

<sup>2</sup> Department of Regional Geography and Environment, Faculty of Geography, University of Bucharest, 1 Bd. N. Bălcescu, 010041 Bucharest, Romania

<sup>3</sup> Swiss Federal Research Institute WSL, Land Use Systems Group

<sup>4</sup> Danube Delta National Institute for Research and Development, Tulcea, Romania

<sup>5</sup> Faculty of Geography, University of Bucharest Bd. N. Bălcescu, 1, 010041 Bucharest, Romania

**Corresponding author:** Nicu Alexandru Gilea, email: [nicu.gilea@s.unibuc.ro](mailto:nicu.gilea@s.unibuc.ro), tel. 0730633963

### *Landscape Ecology*

#### Methods Applied for Calculating Permeability Scores

Permeability Scores (P.S.) were established through a two-step process, combining statistical analysis and literature-based refinement. In the first step, Resource Selection Functions (RSF) were used to perform statistical calculations of habitat preference, and in the second step, the preliminary scores were adjusted and validated using information from the scientific literature.

The method was applied to the following variables: LULC, SOIL, ASPECT, SLOPE.

**Step 1.** The methodology for assigning permeability scores (on a 0–10 scale) is based on statistical analysis derived from the principles of RSF. We used the Selection Ratio ( $w_i$ ) to quantify habitat preference, which was then logarithmically linear normalized (scaled 0–10) to obtain the Permeability Scores (P.S.). The Selection Ratio quantifies the relative preference of the species for a particular habitat class (i) by comparing resource use (presence) with its availability (background)(Boyce et al., 2002; Manly et al., 2002).

We used 483 presence points and 5000 pseudo-absence points. Environmental variable values were extracted for each point, and selection ratios (SR) were then calculated. For each class (LULC, SOIL, ASPECT, SLOPE), we calculated the proportion of presence points and the proportion of background points:

Calculation of proportions:

$$\%Presence_i = \frac{n_{presence,i}}{N_{total\ presence}} \times 100$$

$$\%PseudoAbsence_i = \frac{n_{background,i}}{N_{total\ background}} \times 100$$

where,

$n_{presence,i}$  = number of presence points in class i

$N_{total\ presence}$  = total number of presence points

$n_{background,i}$  = number of background points in class i

$N_{total\ background}$  = total number of background points

Calculation of the Selection Ratio ( $w_i$ ):

The selection ratio is calculated as the ratio between the proportion of presence points and the proportion of background points:

$$w_i = \frac{\%Presence_i}{\%PseudoAbsence_i}$$

Interpretation:

$w_i > 1$  the habitat class is selected more than expected (preferred)

$w_i < 1$  the habitat class is avoided

Normalization and Scaling to a 0–10 Scale.

To obtain a final intuitive permeability score (P.S.) ranging from 0 to 10, the  $w_i$  values are transformed using a logarithmic linear normalization, a simplification of the min–max normalization. This allows the minimum and maximum values to be scaled appropriately:

$$P.S._i = 10 \times \frac{\ln(1 + w_i) - \ln(1 + w_{min})}{\ln(1 + w_{max}) - \ln(1 + w_{min})}$$

where,

$P.S._i$  = permeability score for the class  $i$

$w_{max} = \max_i (w_i)$  = maximum value of the selection ratio among all classes (the class with  $w_i = w_{max}$  receives a score of 10, while classes  $w_i = 0$  receive a score of 0)

$w_{min} = \min (w_i)$  = minimum value of the selection ratio among all classes.

The results of these calculations, along with the data used for the analysis, are presented in Table 1.

**Table 1.** Selection ratios ( $w_i$ ) and calculated permeability scores ( $P.S.$ ) for each class of environmental variables (LULC, SOIL, ASPECT, SLOPE) used in the analysis.

| COD    | CLASS                                 | Presence | Pseudoabsence | %Presence <sub><i>i</i></sub> | %PseudoAbsence <sub><i>i</i></sub> | $w_i$ | $w_{max}$ | $w_{min}$ | Permeability Score <sub><i>i</i></sub> |
|--------|---------------------------------------|----------|---------------|-------------------------------|------------------------------------|-------|-----------|-----------|----------------------------------------|
| LULC   | Water                                 | 0        | 15            | 0.0                           | 0.3                                | 0.0   | 4.0       | 0         | 0                                      |
|        | Shrubs (SWF)                          | 47       | 212           | 9.7                           | 4.2                                | 2.3   | 4.0       | 0         | 8                                      |
|        | Built-up Area / Artificial Surfaces   | 1        | 104           | 0.2                           | 2.1                                | 0.1   | 4.0       | 0         | 1                                      |
|        | Agricultural Crops / Arable Land      | 53       | 1392          | 11.0                          | 27.8                               | 0.4   | 4.0       | 0         | 2                                      |
|        | Roads                                 | 3        | 26            | 0.6                           | 0.5                                | 1.2   | 4.0       | 0         | 5                                      |
|        | Orchard                               | 0        | 69            | 0.0                           | 1.4                                | 0.0   | 4.0       | 0         | 0                                      |
|        | Bare Land / Sparsely Vegetated Area   | 7        | 18            | 1.4                           | 0.4                                | 4.0   | 4.0       | 0         | 10                                     |
|        | Coniferous Forests                    | 0        | 57            | 0.0                           | 1.1                                | 0.0   | 4.0       | 0         | 0                                      |
|        | Deciduous Forests                     | 29       | 1322          | 6.0                           | 26.4                               | 0.2   | 4.0       | 0         | 1                                      |
|        | Pastures / Grassland                  | 343      | 1785          | 71.0                          | 35.7                               | 2.0   | 4.0       | 0         | 7                                      |
| SOIL   | Argilvisols                           | 62       | 2043          | 12.8                          | 40.9                               | 0.3   | 3.4       | 0         | 2                                      |
|        | Cambisols                             | 70       | 852           | 14.5                          | 17.0                               | 0.9   | 3.4       | 0         | 4                                      |
|        | Supplementary Classes (Water)         | 0        | 1             | 0.0                           | 0.0                                | 0.0   | 3.4       | 0         | 0                                      |
|        | Mollisols                             | 217      | 661           | 44.9                          | 13.2                               | 3.4   | 3.4       | 0         | 10                                     |
|        | Halomorphic Soils                     | 0        | 2             | 0.0                           | 0.0                                | 0.0   | 3.4       | 0         | 0                                      |
|        | Hydromorphic Soils                    | 25       | 318           | 5.2                           | 6.4                                | 0.8   | 3.4       | 0         | 4                                      |
|        | Undeveloped/Truncated/Disturbed Soils | 98       | 1077          | 20.3                          | 21.5                               | 0.9   | 3.4       | 0         | 5                                      |
|        | Organic Soils (Histosols)             | 0        | 3             | 0.0                           | 0.1                                | 0.0   | 3.4       | 0         | 0                                      |
|        | Spodosols                             | 0        | 2             | 0.0                           | 0.0                                | 0.0   | 3.4       | 0         | 0                                      |
|        | Umbrisols                             | 0        | 7             | 0.0                           | 0.1                                | 0.0   | 3.4       | 0         | 0                                      |
|        | Vertisols                             | 11       | 34            | 2.3                           | 0.7                                | 3.3   | 3.4       | 0         | 10                                     |
| ASPECT | Flat / Level (-1)                     | 0        | 0             | 0.0                           | 0.0                                | 0.0   | 1.8       | 0         | 0                                      |
|        | North (0-22.5)                        | 44       | 525           | 9.1                           | 10.5                               | 0.9   | 1.8       | 0         | 6                                      |
|        | North-East (22.5-67.5)                | 66       | 565           | 13.7                          | 11.3                               | 1.2   | 1.8       | 0         | 8                                      |
|        | East (67.5-112.5)                     | 50       | 699           | 10.4                          | 14.0                               | 0.7   | 1.8       | 0         | 5                                      |
|        | South-East (112.5-157.5)              | 39       | 509           | 8.1                           | 10.2                               | 0.8   | 1.8       | 0         | 6                                      |
|        | South (157.5-202.5)                   | 91       | 702           | 18.8                          | 14.1                               | 1.3   | 1.8       | 0         | 8                                      |
|        | South-West (202.5-247.5)              | 83       | 483           | 17.2                          | 9.7                                | 1.8   | 1.8       | 0         | 10                                     |
|        | West (247.5-292.5)                    | 47       | 631           | 9.7                           | 12.6                               | 0.8   | 1.8       | 0         | 6                                      |

|      |                          |     |      |      |      |     |     |   |    |
|------|--------------------------|-----|------|------|------|-----|-----|---|----|
|      | North-West (292.5-337.5) | 30  | 558  | 6.2  | 11.2 | 0.6 | 1.8 | 0 | 4  |
|      | North (337.5-360)        | 33  | 328  | 6.8  | 6.4  | 1.1 | 1.8 | 0 | 7  |
| SLOP | 0–3°                     | 55  | 1475 | 11.4 | 29.5 | 0.4 | 1.7 | 0 | 0  |
|      | 3–10°                    | 275 | 2299 | 56.9 | 46.0 | 1.2 | 1.7 | 0 | 7  |
|      | 10–20°                   | 128 | 1076 | 26.5 | 21.5 | 1.2 | 1.7 | 0 | 7  |
|      | 20–30°                   | 25  | 149  | 5.2  | 3.0  | 1.7 | 1.7 | 0 | 10 |
|      | >30°                     | 0   | 1    | 0.0  | 0.0  | 0.0 | 1.7 | 0 | 0  |

**Step 2.** In the second step, the preliminary permeability scores were adjusted and validated using information from the scientific literature. This involved integrating habitat characteristics, species preferences, and previously published ecological knowledge to obtain the final P.S. values. Thus, the final scores reflect both the statistical analysis based on presence and background data and the documented ecological information, providing a realistic estimate of habitat permeability for the threatened species (Table 2).

**Table 2.** Adjusted Permeability Scores for Environmental Variables of Analyzed Species with Justifications and Literature Sources

| Environmental variable | CLASS                               | Preliminary score | Adjusted score | Justification                                                                                                                      | Literature source(s)                                                                                                                                                                                                                                                       |
|------------------------|-------------------------------------|-------------------|----------------|------------------------------------------------------------------------------------------------------------------------------------|----------------------------------------------------------------------------------------------------------------------------------------------------------------------------------------------------------------------------------------------------------------------------|
| LULC                   | Water                               | 0                 | 0              | -                                                                                                                                  | (D. S. Chirilă, 2022; S. D. Chirilă, 2021; S. D. Chirilă, Bădărău, et al., 2025; S. D. Chirilă, Doroftei, et al., 2025; S. D. Chirilă et al., 2022; S. D. Chirilă & Kiril, 2024; Cieslak, 2013; Cieslak, 2013; FloraVeg.EU, 2025; Mucina et al., 2016; Sádlo et al., 2007) |
|                        | Shrubs / Scrub (SWF)                | 8                 | 8              | -                                                                                                                                  |                                                                                                                                                                                                                                                                            |
|                        | Built-up Area/Artificial Surfaces   | 1                 | 0              | Non-habitat                                                                                                                        |                                                                                                                                                                                                                                                                            |
|                        | Agricultural Crops / Arable Land    | 2                 | 1              | Non-habitat                                                                                                                        |                                                                                                                                                                                                                                                                            |
|                        | Roads                               | 5                 | 0              | Non-habitat                                                                                                                        |                                                                                                                                                                                                                                                                            |
|                        | Orchard                             | 0                 | 1              | Species have also been observed in orchards                                                                                        |                                                                                                                                                                                                                                                                            |
|                        | Bare Land / Sparsely Vegetated Area | 10                | 5              | Habitat vegetation cover between 40–90%                                                                                            |                                                                                                                                                                                                                                                                            |
|                        | Coniferous Forests                  | 0                 | 1              | The species have also been observed within open (sparse) coniferous forests.                                                       |                                                                                                                                                                                                                                                                            |
|                        | Deciduous Forests                   | 1                 | 1              | -                                                                                                                                  |                                                                                                                                                                                                                                                                            |
|                        | Pastures / Grassland                | 7                 | 10             | Main habitat type mentioned in the literature                                                                                      |                                                                                                                                                                                                                                                                            |
| SOIL                   | Argiluvissols                       | 2                 | 7              | Nutrient-rich, well-drained soils formed on loess, similar to Feozem/Chernozem conditions favorable for the species.               |                                                                                                                                                                                                                                                                            |
|                        | Cambisols                           | 4                 | 8              | Moderately fertile, well-drained soils with neutral to slightly acidic pH (6.0–7.0), providing suitable conditions for the species |                                                                                                                                                                                                                                                                            |
|                        | Supplementary Classes (Water)       | 0                 | 0              | -                                                                                                                                  |                                                                                                                                                                                                                                                                            |

|        |                                       |    |    |                                                                                                                       |  |
|--------|---------------------------------------|----|----|-----------------------------------------------------------------------------------------------------------------------|--|
|        | Mollisols                             | 10 | 10 | -                                                                                                                     |  |
|        | Halomorphic Soils                     | 0  | 0  | -                                                                                                                     |  |
|        | Hydromorphic Soils                    | 4  | 0  | The species does not tolerate excessive soil moisture; hydromorphic soils are generally unsuitable for establishment. |  |
|        | Undeveloped/Truncated/Disturbed Soils | 5  | 5  | -                                                                                                                     |  |
|        | Organic Soils (Histosols)             | 0  | 0  | -                                                                                                                     |  |
|        | Spodosols                             | 0  | 0  | -                                                                                                                     |  |
|        | Umbrisols                             | 0  | 0  | -                                                                                                                     |  |
|        | Vertisols                             | 10 | 5  | Clay-rich, poorly drained soils may hinder establishment despite high nutrient content.                               |  |
| ASPECT | Flat / Level (-1)                     | 0  | 0  | -                                                                                                                     |  |
|        | North (0-22.5)                        | 6  | 5  | Less favorable exposure habitats                                                                                      |  |
|        | North-East (22.5-67.5)                | 8  | 8  | -                                                                                                                     |  |
|        | East (67.5-112.5)                     | 5  | 8  | Eastern-exposed habitats are also preferred                                                                           |  |
|        | South-East (112.5-157.5)              | 6  | 8  | South-eastern-exposed habitats are also preferred                                                                     |  |
|        | South (157.5-202.5)                   | 8  | 10 | Ideal exposure habitats                                                                                               |  |
|        | South-West (202.5-247.5)              | 10 | 10 | Ideal exposure habitats                                                                                               |  |
|        | West (247.5-292.5)                    | 6  | 8  | Western-exposed habitats are also preferred                                                                           |  |
|        | North-West (292.5-337.5)              | 4  | 7  | North-western-exposed habitats are also preferred                                                                     |  |
|        | North (337.5-360)                     | 7  | 5  | Less favorable exposure habitats                                                                                      |  |
| SLOP   | 0–3°                                  | 0  | 5  | Habitats with slightly preferred slope. Species were observed rarely.                                                 |  |
|        | 3–10°                                 | 7  | 10 | Habitats with ideal slope. Species were observed frequently.                                                          |  |
|        | 10–20°                                | 7  | 9  | Habitats with optimal slope. Species were observed regularly.                                                         |  |
|        | 20–30°                                | 10 | 7  | Habitats with optimal slope. Species were observed regularly.                                                         |  |
|        | >30°                                  | 0  | 5  | Habitats with slightly preferred slope. Species were observed rarely.                                                 |  |

## Reference:

- Boyce, M. S., Vernier, P. R., Nielsen, S. E., & Schmiegelow, F. K. A. (2002). Evaluating resource selection functions. *Ecological Modelling*, 157(2–3), 281–300. [https://doi.org/10.1016/S0304-3800\(02\)00200-4](https://doi.org/10.1016/S0304-3800(02)00200-4)
- Chirilă, D. S. (2022). Analysis of the characteristics of some populations of *Crambe tataria* Sebeók from Romania. *Acta Oecologica*, 114, 103810. <https://doi.org/10.1016/j.actao.2021.103810>
- Chirilă, S. D. (2021). Ecological And Chorological Studies Of The Species *Crambe Tataria* Sebeók From Romania. *Rom. J. Biol. – Plant Biol, Bucharest*, 66, 39–54.
- Chirilă, S. D., Bădăraș, A., & Milanovici, S. (2025). Ecology and distribution of *Pontechium maculatum* in Romania. *Comprehensive Plant Biology*, 49(1), 23–38. <https://doi.org/10.2298/CPB2501023C>
- Chirilă, S. D., Cara, I. G., & Motrescu, I. (2022). Habitat preference of the endangered species *Crambe tataria* (Brassicaceae) from Romania. *Tuexenia*, 42, 275–296. <https://doi.org/10.14471/2022.42.009>
- Chirilă, S. D., Doroftei, M., & Gigea, G. (2025). Ecology and distribution of *Paeonia tenuifolia* species in Romania. *Biologia*. <https://doi.org/10.1007/s11756-025-01902-x>
- Chirilă, S. D., & Kiril, V. (2024). Habitat preference for the populations of the endangered species *Pontechium maculatum* (Boraginaceae) in Romania. *Tuexenia*, 44, 131–157. <https://doi.org/10.14471/2024.44.005>
- Cieslak, E. (2013). Variation and genetic structure of *Serratula lycopifolia* populations (Vill.) Kern. (Asteraceae) in Poland and adjacent regions. *Acta Societatis Botanicorum Poloniae*, 82(1), 67–75. <https://doi.org/10.5586/asbp.2013.006>
- Cieślak, E. (2013). Variation and genetic structure of *Serratula lycopifolia* populations (Vill.) Kern. (Asteraceae) in Poland and adjacent regions. *Acta Societatis Botanicorum Poloniae*, 81(4), 67–75. <https://doi.org/10.5586/asbp.2013.006>
- FloraVeg.EU. (2025, September 28). *FloraVeg. EU: Information about species*. <https://floraveg.eu/taxon/>
- Huettmann, F. (2003). “Resource Selection by Animals” by B. J. Manly et al. 2002. [book review]. *The Canadian Field-Naturalist*, 117(2), 325. <https://doi.org/10.22621/cfn.v117i2.717>
- Manly, B. F. J. ., McDonald, L. L. ., Thomas, D. L. ., McDonald, T. L. ., & Erickson, W. P. . (2002). *Resource Selection by Animals : Statistical Design and Analysis for Field Studies*. Springer Netherlands.
- Mucina, L., Bültmann, H., Dierßen, K., Theurillat, J., Raus, T., Čarni, A., Šumberová, K., Willner, W., Dengler, J., García, R. G., Chytrý, M., Hájek, M., Di Pietro, R., Iakushenko, D., Pallas, J., Daniëls, F. J. A., Bergmeier, E., Santos Guerra, A., Ermakov, N., ... Tichý, L. (2016). Vegetation of Europe: hierarchical floristic classification system of vascular plant, bryophyte, lichen, and algal communities. *Applied Vegetation Science*, 19(S1), 3–264. <https://doi.org/10.1111/avsc.12257>
- Sádlo, J., Chytrý, M., & Pyšek, P. (2007). Regional species pools of vascular plants in habitats of the Czech Republic Druhy cévnatých rostlin v biotopech České republiky. *Preslia*, 79, 303–321. [chrome-extension://efaidnbmnnnibpcajpcglefindmkaj/https://www.preslia.cz/article/pdf?id=278](https://efaidnbmnnnibpcajpcglefindmkaj/https://www.preslia.cz/article/pdf?id=278)
